# Supplementary material for: Changes in the impacts of ship emissions on PM 2.5 and its components in China under the staged fuel oil policies
Source: Copernicus journal article supplement (doi:10.5194/egusphere-2024-3892), 2025-01-09
Supplement: Supplementary file 1 [file egusphere-2024-3892-supplement.pdf]

*Supplement of*

**Changes in the impacts of ship emissions on PM<sub>2.5</sub> and its components in China under the staged fuel oil policies**

**Guangyuan Yu et al.**

*Correspondence to:* Yan Zhang ([yan\\_zhang@fudan.edu.cn](mailto:yan_zhang@fudan.edu.cn)) and Cheng Huang ([huangc@saes.sh.cn](mailto:huangc@saes.sh.cn))

The copyright of individual parts of the supplement might differ from the CC BY 4.0 License.

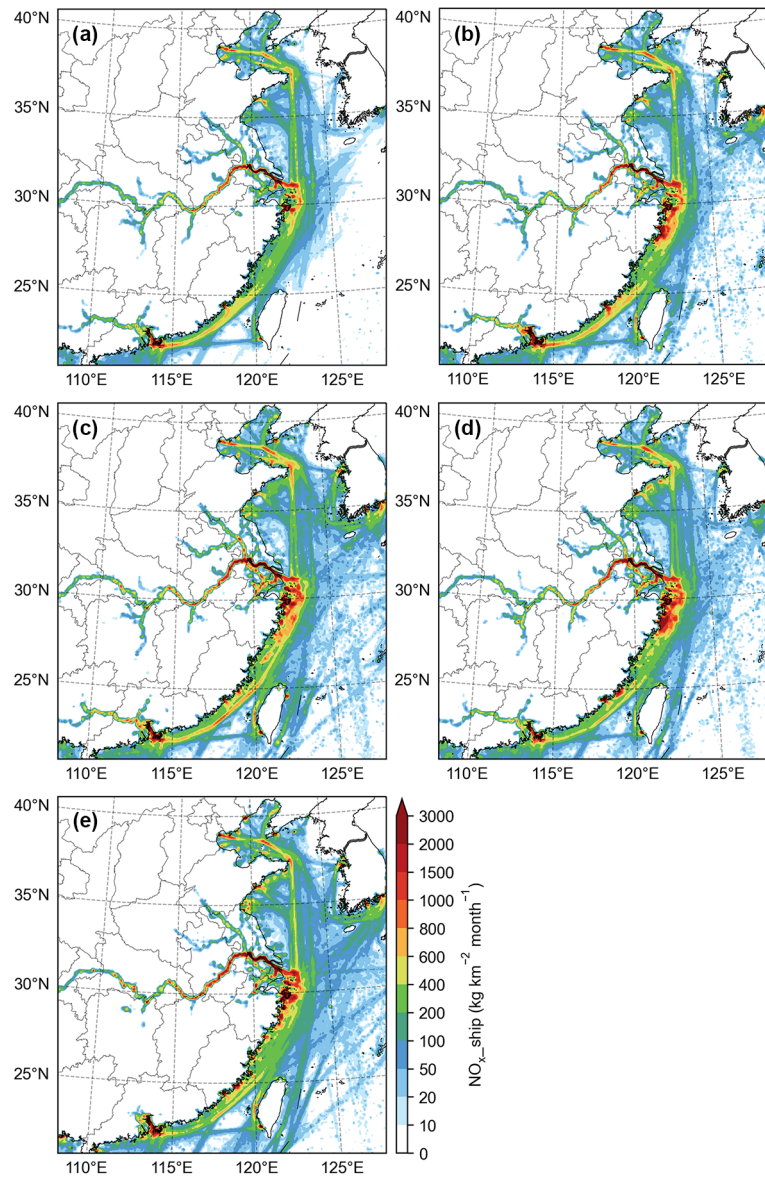

**Figure S1.** Spatial distribution of NO<sub>x</sub> emissions from shipping (NO<sub>x</sub>\_ship) in Domain 2 of the CMAQ model in (a) April 2017, (b) April 2018, (c) April 2019, (d) April 2020, and (e) April 2021.

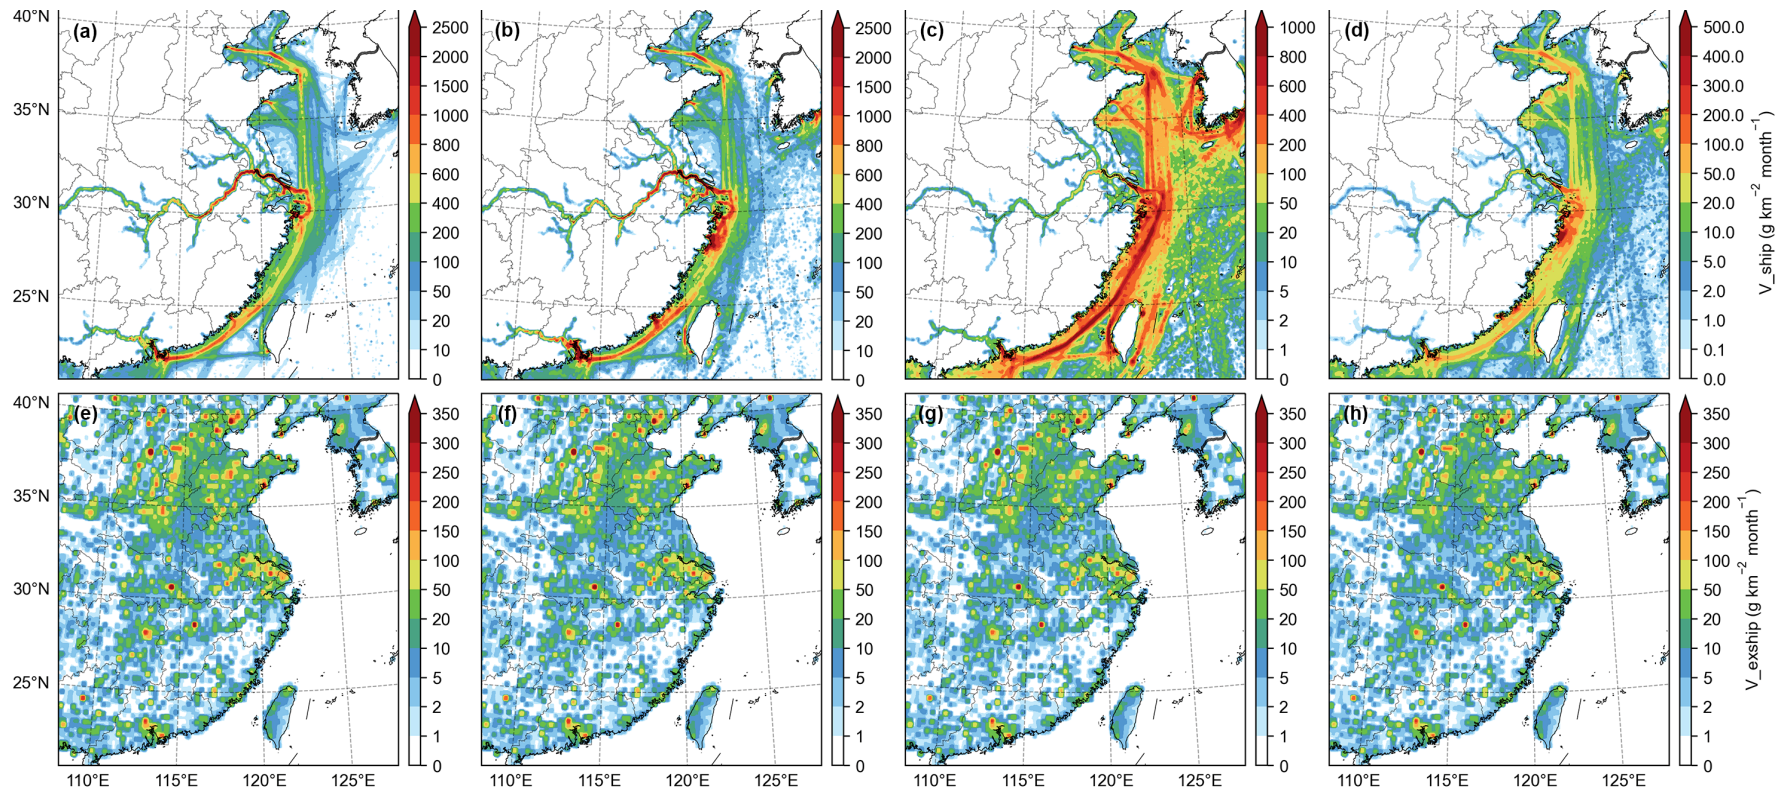

**Figure S2.** Spatial distribution of V emissions from shipping ( $V_{\text{ship}}$ ) in (a) April 2017, (b) April 2018, (c) April 2019, and (d) April 2020; and spatial distribution of V emissions from anthropogenic sources excluding shipping ( $V_{\text{exship}}$ ) in (e) April 2017, (f) April 2018, (g) April 2019, and (h) April 2020.



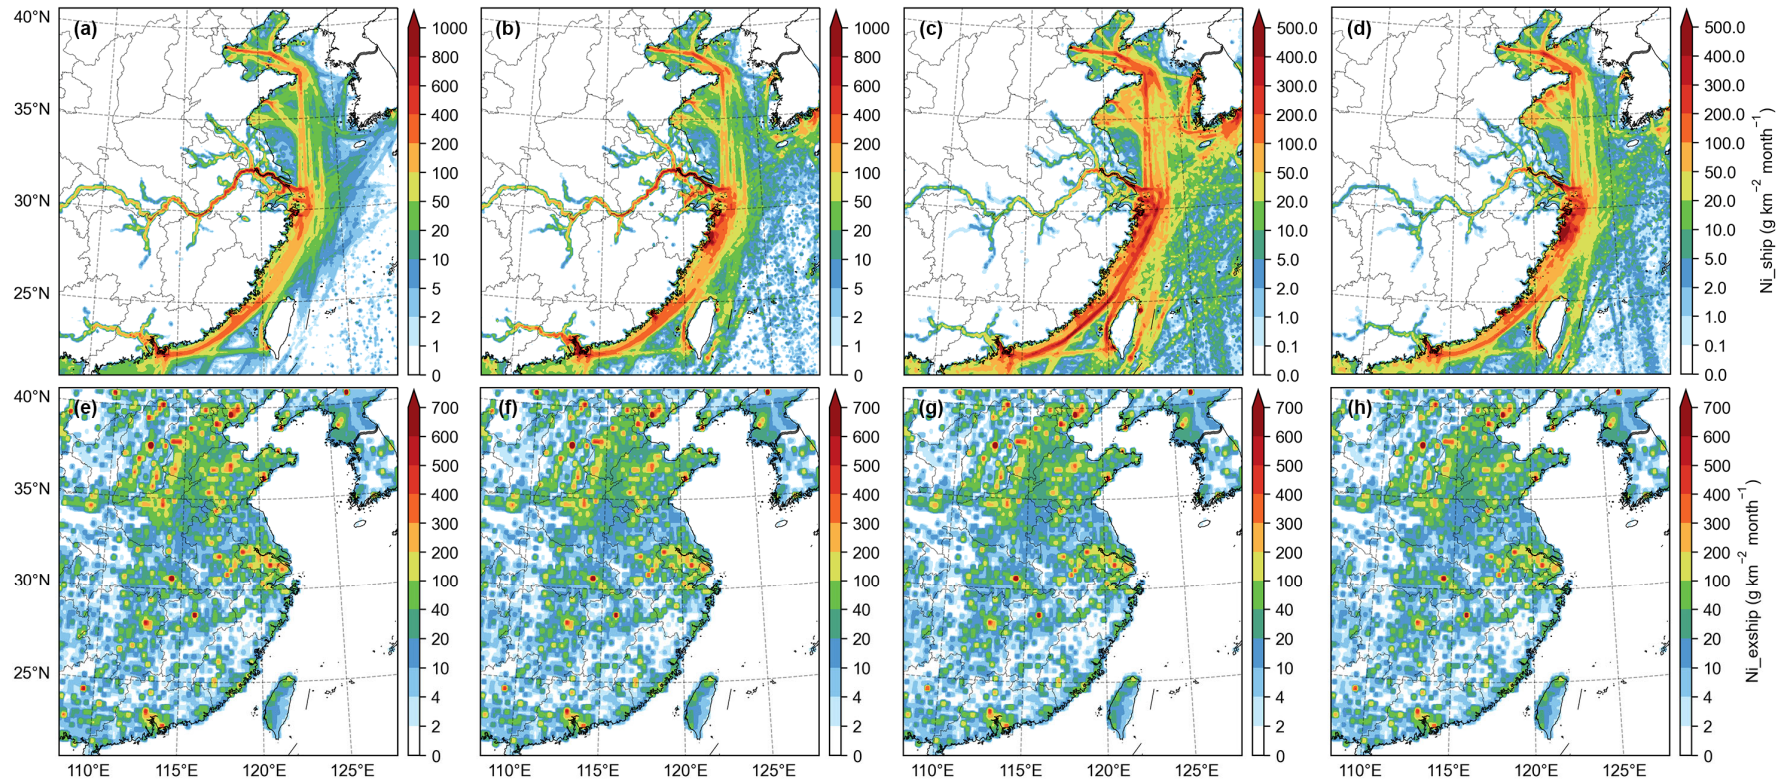

**Figure S3.** Spatial distribution of Ni emissions from shipping ( $Ni_{ship}$ ) in (a) April 2017, (b) April 2018, (c) April 2019, and (d) April 2020; and spatial distribution of Ni emissions from anthropogenic sources excluding shipping ( $Ni_{exship}$ ) in (e) April 2017, (f) April 2018, (g) April 2019, and (h) April 2020.



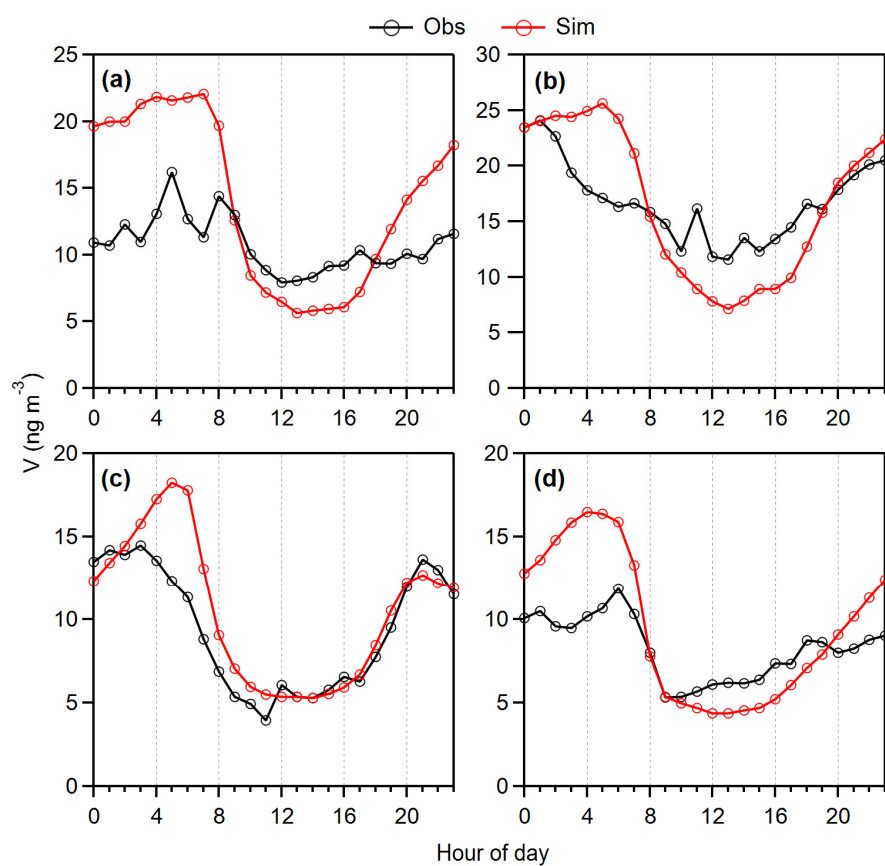

**Figure S4.** Comparison of observed (Obs) and simulated (Sim) diurnal variations of the V concentrations at the Pudong site of Shanghai in **(a)** January, **(b)** April, **(c)** July, and **(d)** October of 2017.

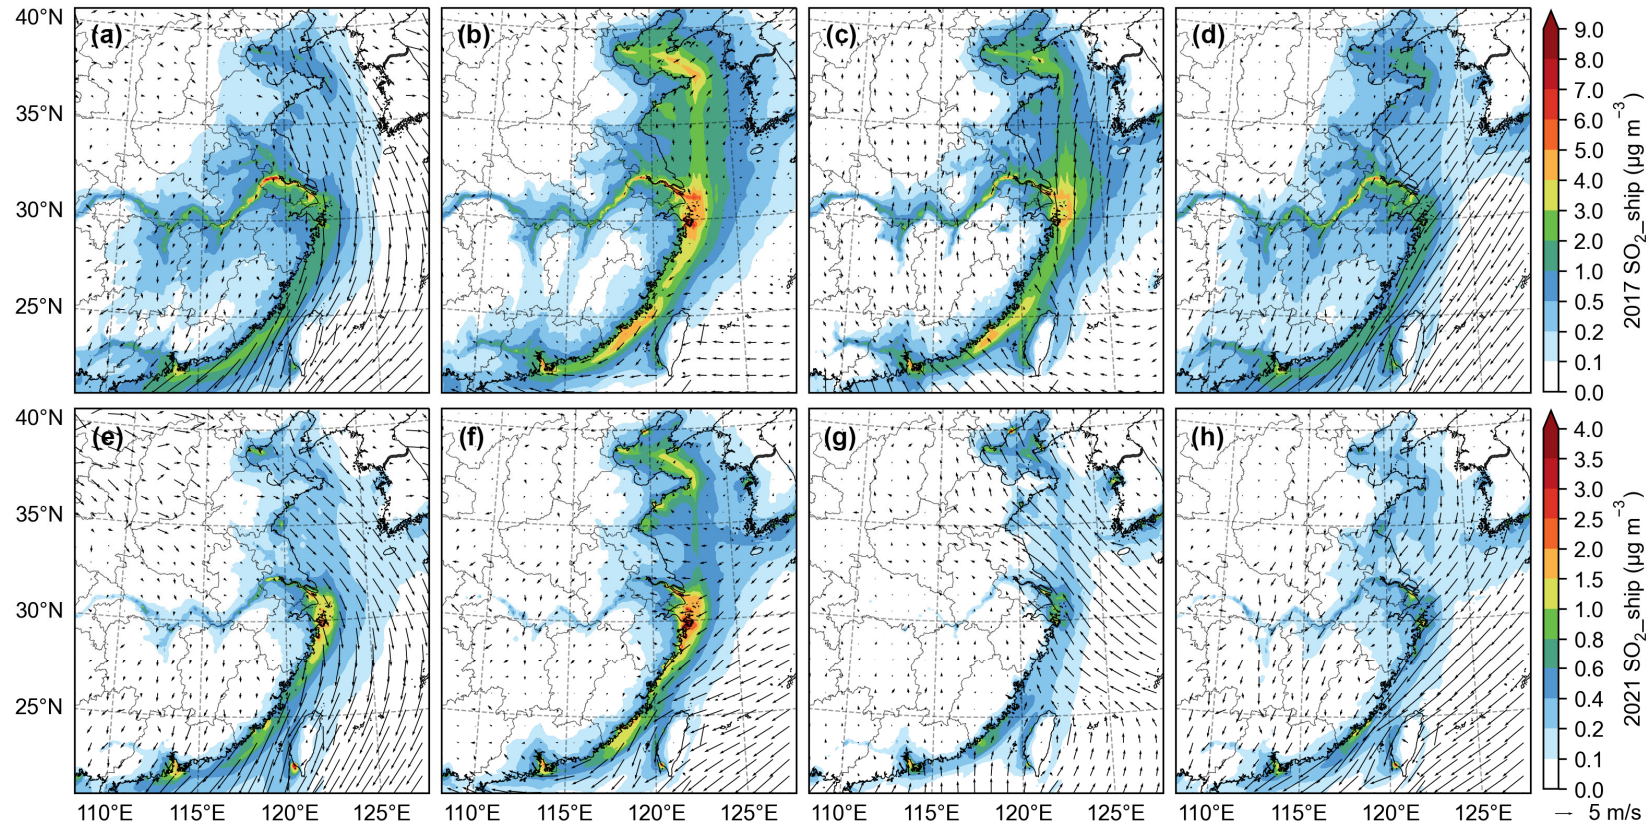

**Figure S5.** Seasonal variations of the impacts of ship emissions on the SO<sub>2</sub> concentrations (SO<sub>2</sub>\_ship) and simulated wind fields in **(a)** January 2017, **(b)** April 2017, **(c)** July 2017, **(d)** October 2017, **(e)** January 2021, **(f)** April 2021, **(g)** July 2021, and **(h)** October 2021.

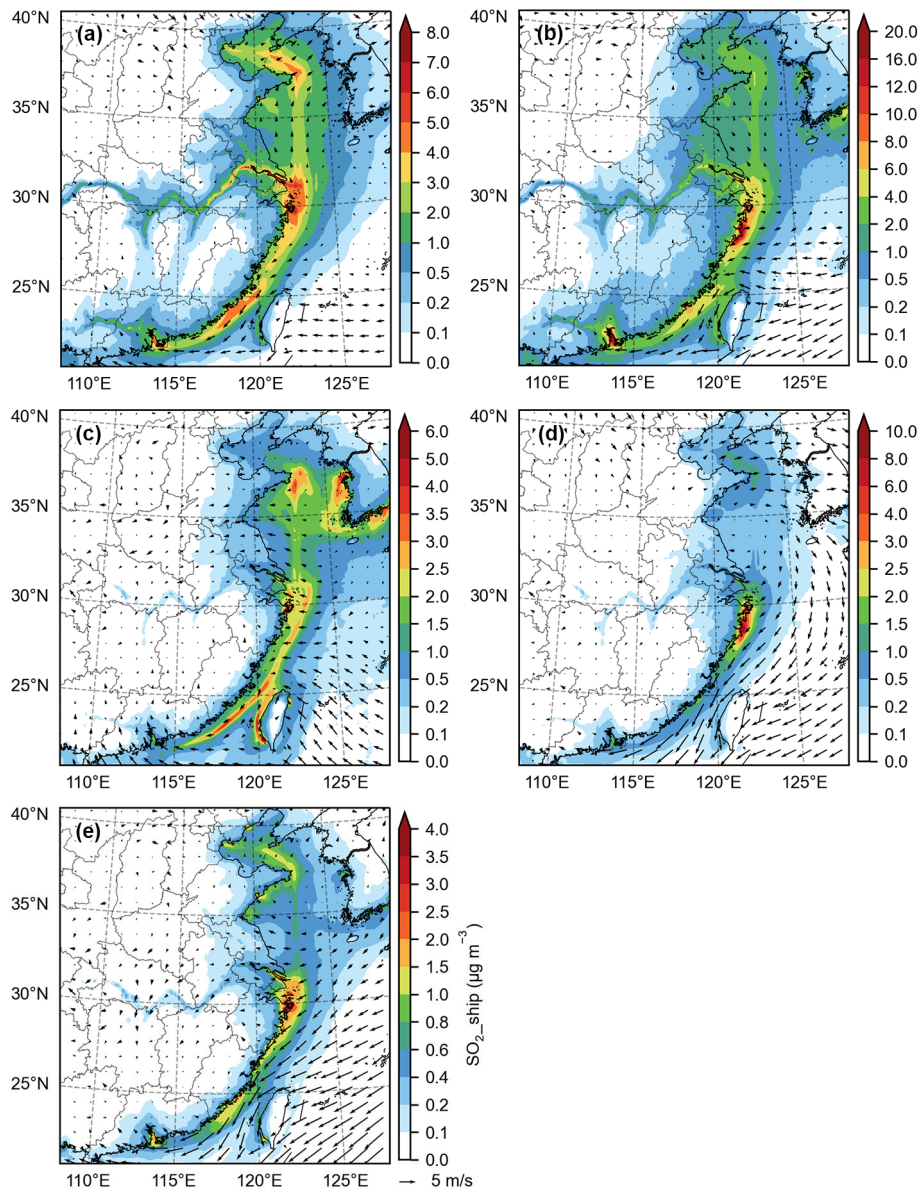

**Figure S6.** Impacts of ship emissions on the SO<sub>2</sub> concentrations (SO<sub>2</sub>\_ship) and simulated wind fields in April of (a) 2017, (b) 2018, (c) 2019, (d) 2020, and (e) 2021.



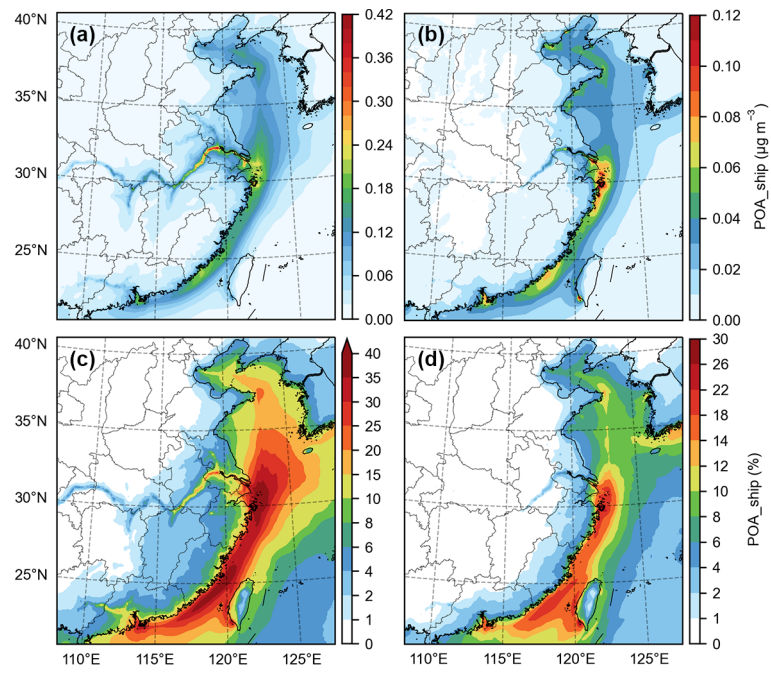

**Figure S7.** Impacts of ship emissions on primary organic aerosols (POA<sub>ship</sub>): for concentration (in  $\mu\text{g m}^{-3}$ ) in **(a)** 2017 and **(b)** 2021; and for contribution (in %) in **(c)** 2017 and **(d)** 2021.

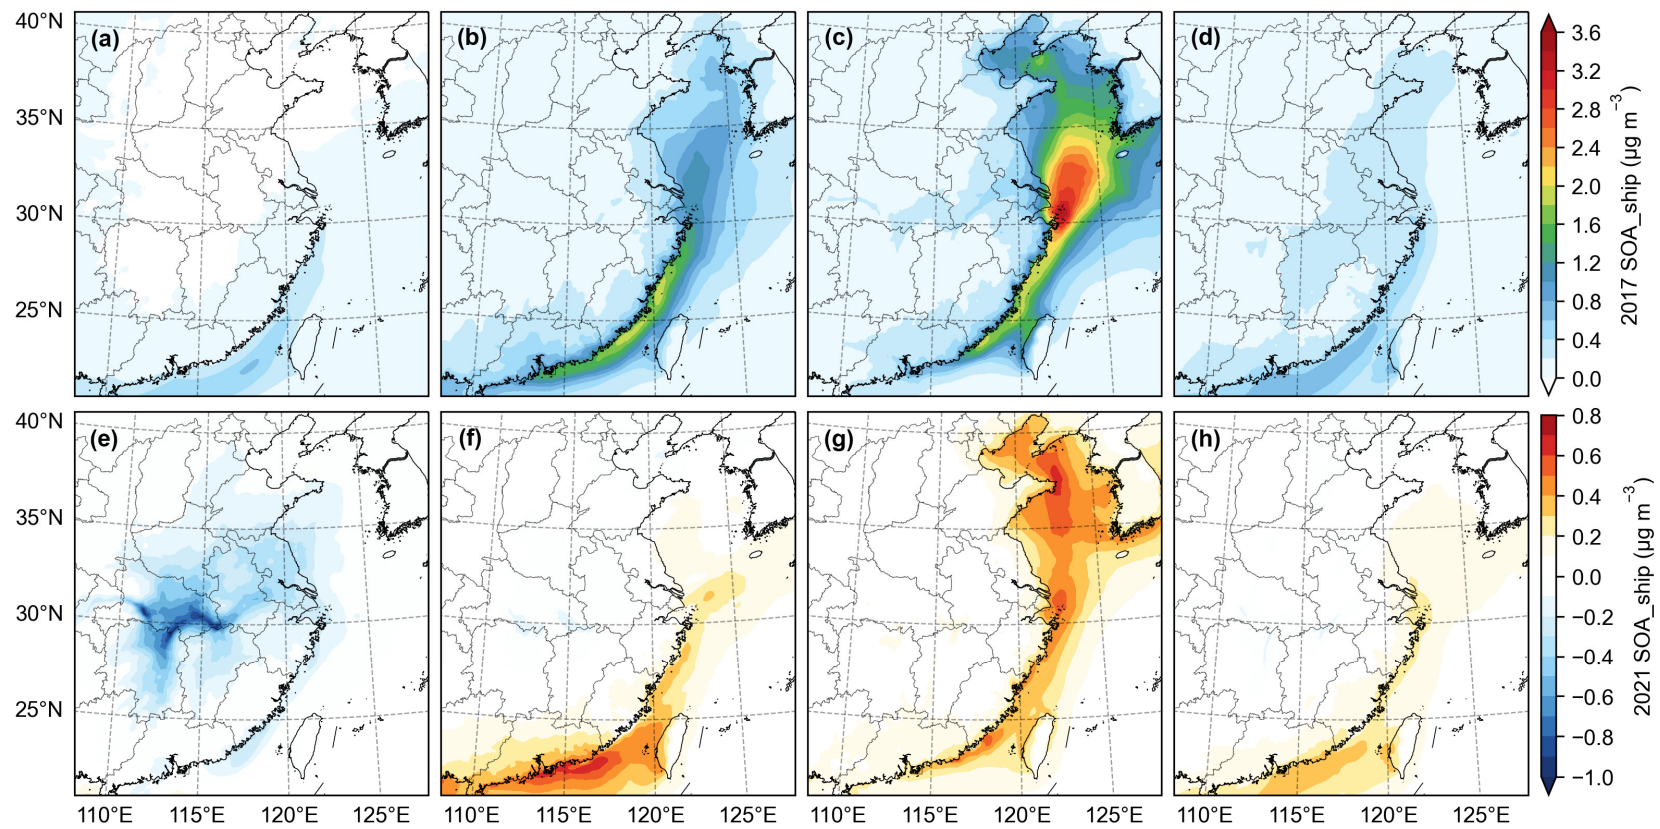

**Figure S8.** Seasonal variations of the potential impacts of ship emissions on secondary organic aerosols (SOA<sub>ship</sub>) in (a) January 2017, (b) April 2017, (c) July 2017, (d) October 2017, (e) January 2021, (f) April 2021, (g) July 2021, and (h) October 2021.

**Table S1.** Power-based emissions factors of main engine (ME) and auxiliary engine (AE) (unit: g kWh<sup>-1</sup>).

| For all areas in 2017–2018 and seas outside the CECA in 2019 |                |                 |                 |      |        |                  |                   |                       |                       |                       |
|--------------------------------------------------------------|----------------|-----------------|-----------------|------|--------|------------------|-------------------|-----------------------|-----------------------|-----------------------|
| Engine type                                                  | Fuel type      | SO <sub>2</sub> | NO <sub>x</sub> | CO   | NMVOCs | PM <sub>10</sub> | PM <sub>2.5</sub> | NH <sub>3</sub>       | V                     | Ni                    |
| ME_SSD                                                       | HSFO           | 10.30           | 14.4            | 0.54 | 0.632  | 1.39             | 1.2788            | 4.90×10 <sup>-3</sup> | 3.18×10 <sup>-2</sup> | 1.03×10 <sup>-2</sup> |
| ME_MSD                                                       | HSFO           | 11.31           | 10.5            | 0.54 | 0.527  | 1.39             | 1.2788            | 2.90×10 <sup>-3</sup> | 1.03×10 <sup>-2</sup> | 3.51×10 <sup>-3</sup> |
| ME_HSD                                                       | MDO/MGO        | 0.42            | 7.7             | 0.54 | 0.527  | 0.18             | 0.1656            | 2.30×10 <sup>-4</sup> | 4.25×10 <sup>-5</sup> | 7.77×10 <sup>-5</sup> |
| AE                                                           | LSFO           | 2.12            | 11.2            | 0.54 | 0.421  | 0.73             | 0.6716            | 8.60×10 <sup>-6</sup> | 5.42×10 <sup>-4</sup> | 1.03×10 <sup>-3</sup> |
| For the CECA in 2019                                         |                |                 |                 |      |        |                  |                   |                       |                       |                       |
| Engine type                                                  | Fuel type      | SO <sub>2</sub> | NO <sub>x</sub> | CO   | NMVOCs | PM <sub>10</sub> | PM <sub>2.5</sub> | NH <sub>3</sub>       | V                     | Ni                    |
| ME_SSD                                                       | LSHFO          | 1.91            | 14.4            | 0.54 | 0.632  | 0.73             | 0.6716            | 4.90×10 <sup>-3</sup> | 1.26×10 <sup>-2</sup> | 1.03×10 <sup>-2</sup> |
| ME_MSD                                                       | LSHFO          | 2.09            | 10.5            | 0.54 | 0.527  | 0.73             | 0.6716            | 2.90×10 <sup>-3</sup> | 4.10×10 <sup>-3</sup> | 3.51×10 <sup>-3</sup> |
| ME_HSD                                                       | MDO/MGO        | 0.42            | 7.7             | 0.54 | 0.527  | 0.18             | 0.1656            | 2.30×10 <sup>-4</sup> | 4.25×10 <sup>-5</sup> | 7.77×10 <sup>-5</sup> |
| AE                                                           | ULSFO/<br>LSFO | 1.25            | 11.2            | 0.54 | 0.421  | 0.46             | 0.4232            | 8.60×10 <sup>-6</sup> | 2.15×10 <sup>-4</sup> | 6.16×10 <sup>-4</sup> |
| For sea areas in 2020–2021                                   |                |                 |                 |      |        |                  |                   |                       |                       |                       |
| Engine type                                                  | Fuel type      | SO <sub>2</sub> | NO <sub>x</sub> | CO   | NMVOCs | PM <sub>10</sub> | PM <sub>2.5</sub> | NH <sub>3</sub>       | V                     | Ni                    |
| ME_SSD                                                       | LSHFO          | 1.91            | 14.4            | 0.54 | 0.632  | 0.73             | 0.6716            | 4.90×10 <sup>-3</sup> | 3.18×10 <sup>-3</sup> | 6.16×10 <sup>-3</sup> |
| ME_MSD                                                       | LSHFO          | 2.09            | 10.5            | 0.54 | 0.527  | 0.73             | 0.6716            | 2.90×10 <sup>-3</sup> | 1.03×10 <sup>-3</sup> | 2.10×10 <sup>-3</sup> |
| ME_HSD                                                       | MDO/MGO        | 0.42            | 7.7             | 0.54 | 0.527  | 0.18             | 0.1656            | 2.30×10 <sup>-4</sup> | 4.25×10 <sup>-5</sup> | 7.77×10 <sup>-5</sup> |
| AE                                                           | ULSFO/<br>LSFO | 1.25            | 11.2            | 0.54 | 0.421  | 0.46             | 0.4232            | 8.60×10 <sup>-6</sup> | 9.63×10 <sup>-5</sup> | 5.54×10 <sup>-4</sup> |

Note: ME and AE are main engine and auxiliary engine, respectively. SSD, MSD, and HSD are slow-speed diesel, medium-speed diesel, and high-speed diesel, respectively.

HSFO is high sulfur fuel oil with a sulfur content of ~2.7%. LSFO is low sulfur fuel oil with a sulfur content of ~0.5%. ULSFO is ultra-low sulfur fuel oil with a sulfur content of less than 0.1%. The sulfur content of marine diesel oil (MDO) and marine gas oil (MGO) is assumed to be ~0.1%.



**Table S2.** Source of emission factors of V and Ni from different sectors.

| Power-based emission factors of V and Ni from shipping             |               |                         |                          |                           |                        |
|--------------------------------------------------------------------|---------------|-------------------------|--------------------------|---------------------------|------------------------|
| Engine type                                                        | Fuel type     | Fuel sulfur content (%) | V (g kWh <sup>-1</sup> ) | Ni (g kWh <sup>-1</sup> ) | Reference              |
| ME_SSD                                                             | HFO           | 2.85                    | $1.99 \times 10^{-2}$    | $8.69 \times 10^{-3}$     | Agrawal et al. (2008a) |
|                                                                    |               | 2.05                    | $5.60 \times 10^{-2}$    | $1.27 \times 10^{-2}$     | Agrawal et al. (2008b) |
|                                                                    |               | 2.70                    | $1.94 \times 10^{-2}$    | $0.95 \times 10^{-2}$     | Celo et al. (2015)     |
| ME_MSD                                                             | HFO           | 2.70                    | $1.43 \times 10^{-2}$    | $4.10 \times 10^{-3}$     | Sippula et al. (2014)  |
|                                                                    |               | 1.48                    | $6.80 \times 10^{-3}$    | $2.43 \times 10^{-3}$     | Celo et al. (2015)     |
|                                                                    |               | 2.21                    | $1.23 \times 10^{-2}$    | $0.55 \times 10^{-2}$     |                        |
|                                                                    |               | 1.60                    | $7.90 \times 10^{-3}$    | $2.00 \times 10^{-3}$     | Streibel et al. (2017) |
| ME_HSD                                                             | MDO           | 0.08                    | $4.25 \times 10^{-5}$    | $7.77 \times 10^{-5}$     | Zhang et al. (2016)    |
| AE_MSD                                                             | RME180 (LSFO) | 0.412–0.501             | $1.89 \times 10^{-4}$    | $1.03 \times 10^{-3}$     | Hou et al. (2023)      |
|                                                                    | MGO           | 0.0172–0.0461           | $3.52 \times 10^{-6}$    | $7.63 \times 10^{-5}$     |                        |
| Mass fractions of V and Ni in PM <sub>2.5</sub> from other sources |               |                         |                          |                           |                        |
| Sector                                                             |               | V (%)                   |                          | Ni (%)                    | Reference              |
| Industry                                                           |               | 0.012                   |                          | 0.0265                    | Liu et al. (2018)      |
| Power                                                              |               | 0.019                   |                          | 0.050                     |                        |
| Residential                                                        |               | 0.002                   |                          | 0.005                     |                        |
| Transportation                                                     |               | 0.006                   |                          | 0.014                     |                        |

**Table S3.** Mapping of PM<sub>2.5</sub> components to the AERO7 species.

| Species | Industry              | Power                 | Residential           | Land-based transportation | Shipping (HSFO)       | Shipping (LSHFO)      |
|---------|-----------------------|-----------------------|-----------------------|---------------------------|-----------------------|-----------------------|
| PAL     | $4.71 \times 10^{-2}$ | $5.26 \times 10^{-2}$ | $6.70 \times 10^{-3}$ | $3.45 \times 10^{-2}$     | $9.30 \times 10^{-5}$ | $2.17 \times 10^{-2}$ |
| PCA     | $3.27 \times 10^{-2}$ | $2.56 \times 10^{-2}$ | $1.16 \times 10^{-2}$ | $1.04 \times 10^{-2}$     | $3.29 \times 10^{-2}$ | $3.29 \times 10^{-2}$ |
| PCL     | $1.04 \times 10^{-2}$ | $1.48 \times 10^{-2}$ | $9.05 \times 10^{-4}$ | $6.90 \times 10^{-3}$     | $5.47 \times 10^{-3}$ | $9.25 \times 10^{-4}$ |
| PEC     | $5.49 \times 10^{-2}$ | $3.16 \times 10^{-2}$ | $2.40 \times 10^{-1}$ | $1.01 \times 10^{-1}$     | $4.09 \times 10^{-2}$ | $6.98 \times 10^{-2}$ |
| PFE     | $2.14 \times 10^{-2}$ | $3.34 \times 10^{-2}$ | $8.59 \times 10^{-3}$ | $1.89 \times 10^{-2}$     | $4.98 \times 10^{-3}$ | $6.71 \times 10^{-3}$ |
| PK      | $3.60 \times 10^{-3}$ | $4.90 \times 10^{-3}$ | $5.33 \times 10^{-3}$ | $2.40 \times 10^{-3}$     | $8.38 \times 10^{-4}$ | $8.38 \times 10^{-4}$ |
| PMG     | $1.11 \times 10^{-2}$ | $1.38 \times 10^{-2}$ | $2.90 \times 10^{-3}$ | $1.63 \times 10^{-2}$     | $8.71 \times 10^{-4}$ | $8.71 \times 10^{-4}$ |
| PMN     | $8.40 \times 10^{-4}$ | $4.50 \times 10^{-4}$ | $1.50 \times 10^{-4}$ | $1.90 \times 10^{-4}$     | $5.03 \times 10^{-4}$ | $5.03 \times 10^{-4}$ |
| PNA     | $3.00 \times 10^{-3}$ | $3.60 \times 10^{-3}$ | $2.02 \times 10^{-4}$ | $3.20 \times 10^{-3}$     | $6.19 \times 10^{-3}$ | $6.19 \times 10^{-3}$ |
| PNCOM   | $4.40 \times 10^{-2}$ | $4.23 \times 10^{-2}$ | $1.79 \times 10^{-1}$ | $6.33 \times 10^{-2}$     | $1.42 \times 10^{-1}$ | $8.16 \times 10^{-2}$ |
| PNH4    | $3.36 \times 10^{-2}$ | $2.69 \times 10^{-2}$ | $1.41 \times 10^{-2}$ | $7.90 \times 10^{-3}$     | $2.26 \times 10^{-2}$ | $2.29 \times 10^{-2}$ |
| PNO3    | $2.26 \times 10^{-2}$ | $2.19 \times 10^{-2}$ | $3.15 \times 10^{-3}$ | $1.41 \times 10^{-2}$     | $1.27 \times 10^{-2}$ | $3.23 \times 10^{-3}$ |
| POC     | $1.10 \times 10^{-1}$ | $1.06 \times 10^{-1}$ | $4.48 \times 10^{-1}$ | $2.53 \times 10^{-1}$     | $5.66 \times 10^{-1}$ | $3.26 \times 10^{-1}$ |
| PSI     | $5.51 \times 10^{-2}$ | $5.94 \times 10^{-2}$ | $6.86 \times 10^{-3}$ | $3.45 \times 10^{-2}$     | $6.31 \times 10^{-3}$ | $5.03 \times 10^{-2}$ |
| PSO4    | $1.93 \times 10^{-1}$ | $1.71 \times 10^{-1}$ | $3.32 \times 10^{-2}$ | $5.12 \times 10^{-2}$     | $1.17 \times 10^{-1}$ | $5.77 \times 10^{-2}$ |
| PTI     | $2.20 \times 10^{-3}$ | $4.50 \times 10^{-3}$ | $4.00 \times 10^{-4}$ | $4.50 \times 10^{-3}$     | $1.89 \times 10^{-5}$ | $1.89 \times 10^{-5}$ |

Note: The profiles of industry, power, residential, and transportation sectors for PM<sub>2.5</sub> excluding V and Ni are obtained from Liu et al. (2017). The mass fractions before the IMO Regulation (2017–2019) and after 2020 were referenced from Huang et al. (2018a) and Yang et al. (2022), respectively.

**Table S4.** Convert factors of NMVOCs emissions from shipping to lumped species in the CB6 mechanism.

| Species | Convert factor (mol kg <sup>-1</sup> ) | Mass fraction |
|---------|----------------------------------------|---------------|
| ACET    | 2.12                                   | 12.3%         |
| ALD2    | 0.43                                   | 1.9%          |
| ALDX    | 1.47                                   | 5.5%          |
| BENZ    | 0.30                                   | 2.3%          |
| ETH     | 0.57                                   | 1.6%          |
| ETHA    | 0.14                                   | 0.4%          |
| ETHY    | 0.47                                   | 1.2%          |
| ETOH    | 0                                      | 0             |
| FORM    | 0                                      | 0             |
| IOLE    | 0.23                                   | 1.3%          |
| ISOP    | 0.04                                   | 0.3%          |
| KET     | 0.31                                   | 0.6%          |
| MEOH    | 0                                      | 0             |
| NAPH    | 0.25                                   | 3.2%          |
| OLE     | 1.80                                   | 5.7%          |
| PAR     | 20.83                                  | 30.2%         |
| PRPA    | 0.15                                   | 0.7%          |
| SOAALK  | 2.25 (0.108PAR)                        | -             |
| TERP    | 0                                      | 0             |
| TOL     | 1.83                                   | 16.9%         |
| XYLMN   | 1.49                                   | 15.8%         |

Note: The convert factors were based on the median VOC profiles from the literature (Agrawal et al., 2008a; Huang et al., 2018b; Zhang et al., 2024).



**Table S5.** Vertical layer allocation of emission sectors for CMAQ input.

| Layer | Height (m) | Shipping (marine) | Shipping (inland) | Land-based transportation | NH <sub>3</sub> |
|-------|------------|-------------------|-------------------|---------------------------|-----------------|
| 1     | 0–50       | 20%               | 100%              | 100%                      | 90%             |
| 2     | 50–109     | 80%               | 0                 | 0                         | 2%              |
| 3     | 109–179    | 0                 | 0                 | 0                         | 6%              |
| 4     | 179–261    | 0                 | 0                 | 0                         | 2%              |
| 5     | 261–358    | 0                 | 0                 | 0                         | 0               |
| 6     | 358–472    | 0                 | 0                 | 0                         | 0               |
| 7     | 472–603    | 0                 | 0                 | 0                         | 0               |

  

| Layer | Industry (VOCs) | Industry (except VOCs) | Power | Residential | Biogenic |
|-------|-----------------|------------------------|-------|-------------|----------|
| 1     | 50%             | 0                      | 0     | 100%        | 100%     |
| 2     | 30%             | 20%                    | 10%   | 0           | 0        |
| 3     | 16%             | 60%                    | 10%   | 0           | 0        |
| 4     | 4%              | 20%                    | 30%   | 0           | 0        |
| 5     | 0               | 0                      | 20%   | 0           | 0        |
| 6     | 0               | 0                      | 20%   | 0           | 0        |
| 7     | 0               | 0                      | 10%   | 0           | 0        |

Note: The PKU-NH<sub>3</sub> inventory in 2017 is used for non-shipping NH<sub>3</sub> in mainland China instead of the MEIC inventory.

**Table S6.** Detailed information on the studied cities and the monitoring sites.

| Region                          | City                   | Port type                                                           | Latitude<br>(cell center) | Longitude<br>(cell center) | Meteorological<br>station ID | Air quality monitoring station ID                                                                         | Air quality<br>data size |
|---------------------------------|------------------------|---------------------------------------------------------------------|---------------------------|----------------------------|------------------------------|-----------------------------------------------------------------------------------------------------------|--------------------------|
| Bohai Bay                       | Dalian                 | Sea                                                                 | 38.923                    | 121.601                    | 54662                        | 1109A, 1110A, 1011A, 1012A,<br>1013A                                                                      | 8038                     |
|                                 | Yingkou                | Sea                                                                 | 37.466                    | 121.429                    | 54471                        | 1596A, 1597A, 1598A, 1599A                                                                                | 8057                     |
|                                 | Caofeidian             | Sea                                                                 | 39.229                    | 118.403                    | 54535                        | 3457A                                                                                                     | 1817**                   |
|                                 | Tianjin<br>(downtown)* | Inland                                                              | 39.141                    | 117.185                    | 54527                        | 1015A, 1017A, 1018A, 1019A,<br>1021A, 2860A, 2922A                                                        | 8032                     |
|                                 | Tianjin<br>(Binhai)    | Estuary                                                             | 39.057                    | 117.739                    | 54623                        | 1023A                                                                                                     | 8030                     |
|                                 | Yantai                 | Sea                                                                 | 40.619                    | 122.243                    | 54765                        | 1643A, 1645A                                                                                              | 8016                     |
| Yellow Sea                      | Qingdao                | Sea                                                                 | 36.111                    | 120.413                    | 54857                        | 1309A, 1310A, 1311A, 1312A,<br>1313A                                                                      | 8028                     |
|                                 | Rizhao                 | Sea                                                                 | 35.437                    | 119.442                    | 54945                        | 1659A, 1660A, 1661A, 3507A                                                                                | 8023                     |
|                                 | Lianyungang            | Sea                                                                 | 34.664                    | 119.219                    | 58040                        | 1173A, 3434A, 3664A                                                                                       | 7973                     |
| Yangtze River<br>Delta          | Shanghai               | Estuary/<br>Sea/<br>Inland                                          | 31.217                    | 121.437                    | 58370                        | 1141A, 1142A, 1143A, 1144A,<br>1145A, 1147A, 1148A, 1149A,<br>1150A, 3265A, 3268A,<br>3270A, 3271A, 3273A | 8061                     |
|                                 |                        | 1234A, 1235A, 1236A, 1237A,<br>1239A, 1240A, 1241A, 2871A,<br>3710A |                           |                            |                              |                                                                                                           |                          |
|                                 | Ningbo                 | Sea                                                                 | 29.877                    | 121.634                    | 58562                        | 1258A, 1259A, 1260A                                                                                       | 8064                     |
|                                 | Zhoushan               | Sea                                                                 | 30.029                    | 122.236                    | 58477                        | 1223A, 1224A, 1227A, 1228A,<br>1230A                                                                      | 8036                     |
|                                 | Hangzhou               | Inland                                                              | 30.257                    | 120.155                    | 58457                        | 1168A, 1169A, 1170A, 1171A,<br>1172A, 3432A                                                               | 8058                     |
|                                 | Nantong                | Inland                                                              | 32.05                     | 120.911                    | 58259                        | 1993A, 1994A                                                                                              | 8061                     |
|                                 | Zhangjiagang           | Inland                                                              | 31.884                    | 120.601                    | 58353                        | 1151A, 1152A, 1153A, 1154A,<br>1155A, 1156A, 1158A                                                        | 8037                     |
| Fujian                          | Fuzhou                 | Estuary                                                             | 26.067                    | 119.297                    | 58847                        | 1282A, 1283A, 1284A, 1285A                                                                                | 8037                     |
|                                 | Xiamen                 | Sea                                                                 | 24.54                     | 118.153                    | 59130                        | 1287A, 1288A, 2842A, 3527A                                                                                | 8059                     |
| Pearl River<br>Delta            | Shenzhen               | Estuary                                                             | 22.602                    | 114.025                    | 59493                        | 1356A, 1357A, 1358A, 1359A,<br>3305A, 3306A                                                               | 8036                     |
|                                 | Guangzhou              | Estuary/<br>Inland                                                  | 23.083                    | 113.313                    | 59287                        | 1345A, 1346A, 1348A, 1349A,<br>1352A, 2846A, 3302A                                                        | 8037                     |
|                                 |                        | Estuary                                                             |                           |                            |                              | 1367A, 1368A                                                                                              |                          |
| Beibu Gulf                      | Qinzhou                | Sea                                                                 | 21.935                    | 108.581                    | 59632                        | 2502A, 2503A, 2504A, 3404A                                                                                | 8064                     |
| Yantze River/<br>Central region | Wuhan*                 | Inland                                                              | 30.649                    | 114.262                    | 57494                        | 1325A, 1326A, 1327A, 1328A,<br>1331A, 1333A                                                               | 8033                     |
| Northern region                 | Beijing*               | -                                                                   | 39.905                    | 116.396                    | 54511                        | 1001A, 1003A, 1004A, 1005A,<br>1006A, 1007A, 1011A                                                        | 7987                     |

\* Tianjin (downtown), Wuhan, and Beijing are not included in the 21 representative port cities studied in this paper, and the observational data are only used in the evaluation of the model performance.

**Table S7.** Ship emissions in the 200-nm zone and the coastal provinces of Chinese mainland and their contributions to the total anthropogenic emissions in these areas.

| Shipping                 | SO <sub>2</sub><br>(kt) | NO <sub>x</sub><br>(kt) | CO<br>(kt) | PM <sub>2.5</sub><br>(kt) | V<br>(t) | Ni<br>(t) |
|--------------------------|-------------------------|-------------------------|------------|---------------------------|----------|-----------|
| January 2017             | 42.9                    | 102.9                   | 4.6        | 7.3                       | 122.6    | 42.4      |
| April 2017               | 59.9                    | 142.5                   | 6.3        | 10.2                      | 172.9    | 59.6      |
| July 2017                | 58.0                    | 133.9                   | 5.7        | 9.5                       | 163.1    | 56.0      |
| October 2017             | 54.8                    | 132.0                   | 5.9        | 9.6                       | 157.6    | 54.6      |
| April 2018               | 86.6                    | 199.7                   | 8.8        | 14.5                      | 249.1    | 85.6      |
| April 2019               | 47.9                    | 222.8                   | 10.0       | 10.2                      | 150.4    | 62.0      |
| April 2020               | 20.0                    | 212.8                   | 9.6        | 7.8                       | 23.1     | 47.3      |
| January 2021             | 20.7                    | 220.0                   | 9.9        | 7.9                       | 21.5     | 44.7      |
| April 2021               | 20.8                    | 216.7                   | 9.7        | 7.9                       | 21.2     | 44.2      |
| July 2021                | 17.0                    | 179.6                   | 7.8        | 6.3                       | 17.1     | 35.7      |
| October 2021             | 20.1                    | 216.6                   | 9.9        | 7.7                       | 20.5     | 42.9      |
| 2017 average per month   | 53.9                    | 127.8                   | 5.6        | 9.2                       | 154.0    | 53.1      |
| 2021 average per month   | 19.6                    | 208.2                   | 9.3        | 7.4                       | 20.1     | 41.9      |
| Contribution of shipping | SO <sub>2</sub><br>(%)  | NO <sub>x</sub><br>(%)  | CO<br>(%)  | PM <sub>2.5</sub><br>(%)  | V<br>(%) | Ni<br>(%) |
| January 2017             | 10.4                    | 11.3                    | 0.1        | 2.7                       | 87.0     | 50.1      |
| April 2017               | 15.6                    | 14.6                    | 0.2        | 4.8                       | 90.0     | 57.8      |
| July 2017                | 15.0                    | 13.5                    | 0.1        | 4.5                       | 89.6     | 56.5      |
| October 2017             | 14.7                    | 13.5                    | 0.2        | 4.6                       | 89.6     | 56.7      |
| April 2018               | 24.4                    | 19.5                    | 0.2        | 7.3                       | 93.5     | 68.6      |
| April 2019               | 16.7                    | 21.9                    | 0.3        | 5.5                       | 90.2     | 62.6      |
| April 2020               | 8.4                     | 22.4                    | 0.3        | 4.6                       | 60.4     | 58.0      |
| January 2021             | 7.3                     | 22.3                    | 0.2        | 3.5                       | 57.0     | 54.6      |
| April 2021               | 8.8                     | 22.7                    | 0.3        | 4.6                       | 58.4     | 56.3      |
| July 2021                | 7.0                     | 18.6                    | 0.2        | 3.7                       | 52.1     | 50.0      |
| October 2021             | 8.0                     | 21.3                    | 0.3        | 4.3                       | 56.0     | 54.0      |
| 2017 average             | 13.9                    | 13.2                    | 0.1        | 4.0                       | 89.2     | 55.5      |
| 2021 average             | 7.7                     | 21.2                    | 0.3        | 4.0                       | 56.0     | 53.8      |

Note: The anthropogenic emissions from sources excluding shipping are obtained from the MEIC inventory, and their values in 2020 (the latest year of the MEIC) are used to represent those in 2021.

**Table S8.** Comparison of hourly meteorological elements between simulated results and observational data.

| City                  | 2-m temperature (°C) |                  |      |       | Relative humidity (%) |                  |      |        | 10-m wind speed (m s <sup>-1</sup> ) |                  |      |       | 10-m wind direction (°) |                  |
|-----------------------|----------------------|------------------|------|-------|-----------------------|------------------|------|--------|--------------------------------------|------------------|------|-------|-------------------------|------------------|
|                       | $\overline{Obs}$     | $\overline{Sim}$ | r    | NMB   | $\overline{Obs}$      | $\overline{Sim}$ | r    | NMB    | $\overline{Obs}$                     | $\overline{Sim}$ | r    | NMB   | $\overline{Obs}$        | $\overline{Sim}$ |
| Shanghai              | 17.79                | 17.75            | 0.97 | -0.2% | 73.2                  | 66.6             | 0.78 | -9.0%  | 2.22                                 | 4.34             | 0.51 | 95.5% | 87.7                    | 96.5             |
| Ningbo                | 18.38                | 18.39            | 0.97 | 0.1%  | 72.1                  | 68.5             | 0.75 | -5.0%  | 3.35                                 | 3.85             | 0.53 | 15.0% | 31.3                    | 110.2            |
| Zhoushan              | 17.60                | 16.61            | 0.96 | -5.6% | 78.6                  | 78.1             | 0.73 | -0.7%  | 3.26                                 | 4.06             | 0.43 | 24.4% | 47.8                    | 92.7             |
| Nantong               | 16.94                | 17.60            | 0.97 | 3.9%  | 75.5                  | 62.8             | 0.80 | -16.8% | 3.81                                 | 4.20             | 0.61 | 10.4% | 74.6                    | 81.5             |
| Zhangjiagang          | 17.49                | 18.01            | 0.97 | 3.0%  | 70.7                  | 60.7             | 0.79 | -14.1% | 2.99                                 | 4.12             | 0.51 | 37.8% | 61.3                    | 81.0             |
| Nanjing               | 17.31                | 17.92            | 0.97 | 3.5%  | 70.4                  | 58.5             | 0.80 | -17.0% | 3.34                                 | 3.99             | 0.51 | 19.3% | 73.5                    | 81.6             |
| Hangzhou              | 18.61                | 19.14            | 0.96 | 2.8%  | 68.1                  | 58.5             | 0.76 | -14.2% | 3.08                                 | 3.49             | 0.46 | 13.3% | 5.2                     | 48.4             |
| Fuzhou                | 21.17                | 20.99            | 0.95 | -0.9% | 70.2                  | 65.2             | 0.60 | -7.1%  | 2.96                                 | 2.69             | 0.41 | -9.1% | 67.4                    | 62.6             |
| Xiamen                | 22.53                | 22.30            | 0.94 | -1.1% | 71.4                  | 64.4             | 0.69 | -9.8%  | 2.65                                 | 3.62             | 0.56 | 36.6% | 89.2                    | 59.0             |
| Guangzhou             | 22.25                | 23.93            | 0.91 | 7.5%  | 78.3                  | 62.3             | 0.68 | -20.4% | 2.66                                 | 4.08             | 0.49 | 53.1% | 1.9                     | 88.8             |
| Shenzhen              | 23.52                | 23.58            | 0.91 | 0.3%  | 75.4                  | 68.6             | 0.75 | -9.1%  | 2.59                                 | 4.46             | 0.48 | 72.2% | 62.1                    | 87.7             |
| Zhuhai                | 23.62                | 23.90            | 0.90 | 1.2%  | 79.5                  | 70.3             | 0.74 | -11.6% | 2.65                                 | 4.20             | 0.48 | 58.3% | 85.8                    | 94.8             |
| Qinzhou               | 22.60                | 22.99            | 0.88 | 1.8%  | 82.2                  | 72.7             | 0.72 | -11.6% | 3.94                                 | 3.96             | 0.56 | 0.6%  | 6.2                     | 35.3             |
| Tianjin<br>(downtown) | 14.01                | 14.56            | 0.97 | 3.9%  | 56.2                  | 44.4             | 0.78 | -20.9% | 3.51                                 | 3.87             | 0.58 | 10.3% | 142.9                   | 203.2            |
| Tianjin (Binhai)      | 13.97                | 13.56            | 0.97 | -2.9% | 56.1                  | 51.0             | 0.76 | -9.1%  | 3.47                                 | 4.45             | 0.56 | 28.2% | 155.2                   | 160.7            |
| Caofeidian            | 12.84                | 12.52            | 0.97 | -2.5% | 62.3                  | 51.9             | 0.77 | -16.8% | 3.26                                 | 4.33             | 0.60 | 32.6% | 206.3                   | 218.3            |
| Yingkou               | 10.84                | 10.65            | 0.98 | -1.7% | 61.6                  | 56.6             | 0.72 | -8.2%  | 4.26                                 | 4.88             | 0.58 | 14.4% | 238.0                   | 238.8            |
| Dalian                | 11.96                | 11.64            | 0.98 | -2.7% | 58.8                  | 60.2             | 0.82 | 2.4%   | 4.03                                 | 4.70             | 0.57 | 16.8% | 312.5                   | 282.4            |
| Yantai                | 13.12                | 13.15            | 0.98 | 0.2%  | 62.0                  | 60.7             | 0.78 | -2.0%  | 4.81                                 | 4.73             | 0.58 | -1.6% | 291.2                   | 280.7            |
| Qingdao               | 13.54                | 13.56            | 0.98 | 0.1%  | 67.9                  | 62.5             | 0.78 | -7.9%  | 4.59                                 | 4.45             | 0.58 | -2.9% | 80.2                    | 97.5             |
| Rizhao                | 14.04                | 14.27            | 0.97 | 1.7%  | 67.6                  | 60.0             | 0.77 | -11.2% | 4.21                                 | 4.03             | 0.54 | -4.3% | 32.2                    | 31.7             |
| Lianyungang           | 14.84                | 15.18            | 0.96 | 2.3%  | 70.8                  | 60.8             | 0.74 | -14.1% | 3.46                                 | 4.35             | 0.61 | 25.8% | 68.8                    | 66.8             |
| Wuhan                 | 17.70                | 18.31            | 0.96 | 3.4%  | 76.4                  | 61.2             | 0.66 | -19.8% | 2.38                                 | 3.60             | 0.56 | 51.1% | 30.0                    | 34.8             |
| Xi'an                 | 14.95                | 16.58            | 0.96 | 10.9% | 64.6                  | 46.6             | 0.72 | -27.8% | 2.63                                 | 3.22             | 0.41 | 22.5% | 44.3                    | 33.4             |
| Beijing               | 13.98                | 14.66            | 0.97 | 4.9%  | 52.1                  | 40.5             | 0.77 | -22.4% | 2.76                                 | 3.37             | 0.54 | 22.0% | 297.9                   | 256.1            |

Note:  $\overline{Obs}$  and  $\overline{Sim}$  are mean values of observational data and simulated results, respectively. The hourly wind direction observational data of Guangzhou started in 2018.

**Table S9.** Comparison of the concentrations of the main air pollutants in the studied cities between simulated results and observational data.

| City               | SO <sub>2</sub> (μg m <sup>-3</sup> ) |                  |      |        | NO <sub>2</sub> (μg m <sup>-3</sup> ) |                  |      |        | MDA8 O <sub>3</sub> (μg m <sup>-3</sup> ) |                  |      |        | PM <sub>2.5</sub> (μg m <sup>-3</sup> ) |                  |      |        |
|--------------------|---------------------------------------|------------------|------|--------|---------------------------------------|------------------|------|--------|-------------------------------------------|------------------|------|--------|-----------------------------------------|------------------|------|--------|
|                    | $\overline{Obs}$                      | $\overline{Sim}$ | r    | NMB    | $\overline{Obs}$                      | $\overline{Sim}$ | r    | NMB    | $\overline{Obs}$                          | $\overline{Sim}$ | r    | NMB    | $\overline{Obs}$                        | $\overline{Sim}$ | r    | NMB    |
| Shanghai           | 8.9                                   | 15.9             | 0.48 | 79.0%  | 39.5                                  | 64.5             | 0.58 | 63.2%  | 108.9                                     | 79.9             | 0.76 | -26.6% | 33.2                                    | 24.4             | 0.55 | -26.6% |
| Ningbo             | 9.2                                   | 6.0              | 0.51 | -34.5% | 33.8                                  | 39.6             | 0.51 | 16.7%  | 102.4                                     | 91.5             | 0.60 | -10.7% | 27.6                                    | 19.2             | 0.54 | -30.7% |
| Zhoushan           | 7.1                                   | 4.0              | 0.51 | -43.9% | 18.9                                  | 23.1             | 0.45 | 22.3%  | 100.0                                     | 89.3             | 0.53 | -10.7% | 19.8                                    | 14.5             | 0.50 | -26.9% |
| Nantong            | 13.5                                  | 8.3              | 0.51 | -38.6% | 33.0                                  | 38.5             | 0.58 | 16.3%  | 109.8                                     | 92.4             | 0.68 | -15.8% | 35.4                                    | 22.7             | 0.56 | -35.8% |
| Zhangjiagang       | 10.9                                  | 9.2              | 0.29 | -15.3% | 37.5                                  | 46.5             | 0.52 | 23.9%  | 107.3                                     | 89.9             | 0.71 | -16.4% | 36.4                                    | 24.4             | 0.58 | -33.0% |
| Nanjing            | 11.4                                  | 10.0             | 0.33 | -12.1% | 42.0                                  | 51.5             | 0.52 | 22.5%  | 108.4                                     | 89.5             | 0.65 | -17.5% | 35.4                                    | 30.2             | 0.57 | -14.5% |
| Hangzhou           | 8.3                                   | 7.3              | 0.42 | -12.1% | 40.6                                  | 44.5             | 0.45 | 9.5%   | 104.1                                     | 99.7             | 0.74 | -4.2%  | 35.5                                    | 24.0             | 0.51 | -32.4% |
| Fuzhou             | 5.8                                   | 3.8              | 0.24 | -34.0% | 26.6                                  | 21.0             | 0.37 | -21.1% | 97.0                                      | 100.4            | 0.55 | 3.5%   | 26.0                                    | 14.5             | 0.35 | -44.3% |
| Xiamen             | 8.3                                   | 6.2              | 0.40 | -25.6% | 25.8                                  | 36.7             | 0.35 | 41.9%  | 90.7                                      | 94.4             | 0.51 | 4.1%   | 24.7                                    | 19.9             | 0.40 | -19.5% |
| Guangzhou          | 9.7                                   | 9.1              | 0.46 | -5.9%  | 50.9                                  | 43.6             | 0.37 | -14.4% | 97.4                                      | 102.3            | 0.54 | 5.1%   | 31.8                                    | 18.0             | 0.44 | -43.4% |
| Shenzhen           | 6.5                                   | 11.0             | 0.26 | 67.8%  | 29.5                                  | 45.6             | 0.37 | 54.5%  | 89.8                                      | 85.0             | 0.58 | -5.4%  | 24.1                                    | 16.0             | 0.52 | -33.6% |
| Zhuhai             | 5.8                                   | 4.8              | 0.32 | -16.3% | 30.4                                  | 20.0             | 0.48 | -34.2% | 92.5                                      | 104.0            | 0.54 | 12.3%  | 23.5                                    | 13.4             | 0.50 | -42.8% |
| Qinzhou            | 13.8                                  | 3.1              | 0.27 | -77.6% | 19.0                                  | 5.3              | 0.28 | -72.2% | 83.1                                      | 99.9             | 0.51 | 20.1%  | 32.0                                    | 16.6             | 0.58 | -48.4% |
| Tianjin (downtown) | 11.9                                  | 14.8             | 0.49 | 24.5%  | 42.3                                  | 61.8             | 0.58 | 46.1%  | 105.1                                     | 65.1             | 0.78 | -38.1% | 52.8                                    | 32.9             | 0.58 | -37.6% |
| Tianjin (Binhai)   | 11.8                                  | 8.1              | 0.34 | -31.7% | 52.4                                  | 35.3             | 0.50 | -32.9% | 89.0                                      | 79.7             | 0.71 | -10.4% | 50.9                                    | 28.1             | 0.59 | -44.9% |
| Caofeidian         | 9.0                                   | 5.4              | 0.21 | -39.8% | 27.2                                  | 23.3             | 0.60 | -14.1% | 106.1                                     | 92.7             | 0.69 | -12.7% | 33.3                                    | 23.5             | 0.60 | -29.2% |
| Yingkou            | 12.8                                  | 6.7              | 0.56 | -47.4% | 29.2                                  | 23.8             | 0.54 | -18.4% | 110.4                                     | 81.3             | 0.64 | -26.3% | 41.1                                    | 23.7             | 0.54 | -42.2% |
| Dalian             | 12.4                                  | 10.4             | 0.42 | -16.3% | 29.1                                  | 43.9             | 0.40 | 51.1%  | 105.7                                     | 70.0             | 0.58 | -33.8% | 31.7                                    | 27.4             | 0.53 | -13.6% |
| Yantai             | 13.6                                  | 7.2              | 0.39 | -47.1% | 30.8                                  | 25.2             | 0.52 | -18.1% | 106.7                                     | 85.4             | 0.52 | -20.0% | 30.9                                    | 25.2             | 0.60 | -18.6% |
| Qingdao            | 11.6                                  | 12.7             | 0.60 | 9.5%   | 33.8                                  | 43.4             | 0.55 | 28.2%  | 107.1                                     | 76.7             | 0.52 | -28.4% | 33.4                                    | 30.7             | 0.56 | -8.0%  |
| Rizhao             | 10.6                                  | 7.2              | 0.56 | -32.0% | 33.8                                  | 24.7             | 0.53 | -26.9% | 103.6                                     | 89.8             | 0.62 | -13.4% | 41.6                                    | 28.9             | 0.62 | -30.9% |
| Lianyungang        | 14.3                                  | 4.9              | 0.54 | -65.5% | 28.4                                  | 20.1             | 0.52 | -29.1% | 108.2                                     | 93.8             | 0.57 | -13.3% | 40.2                                    | 27.0             | 0.59 | -32.7% |
| Wuhan              | 8.4                                   | 24.1             | 0.44 | 187.8% | 42.1                                  | 44.3             | 0.53 | 5.4%   | 94.0                                      | 94.5             | 0.67 | 0.5%   | 40.7                                    | 43.3             | 0.65 | 6.5%   |
| Xi'an              | 11.7                                  | 10.6             | 0.68 | -9.5%  | 50.9                                  | 33.6             | 0.36 | -34.0% | 90.8                                      | 87.9             | 0.77 | -3.2%  | 55.9                                    | 29.7             | 0.62 | -46.7% |
| Beijing            | 5.6                                   | 9.3              | 0.48 | 69.1%  | 40.0                                  | 66.5             | 0.53 | 66.2%  | 97.4                                      | 69.3             | 0.76 | -28.8% | 49.7                                    | 34.6             | 0.58 | -30.2% |

Note: The concentrations of SO<sub>2</sub>, NO<sub>2</sub>, and PM<sub>2.5</sub> are in hourly resolution. The daily maximum 8-h average (MDA8) O<sub>3</sub> concentrations are in daily resolution. The observational data from Caofeidian started from 17 April 2021.

**Table S10.** Comparison of the hourly concentrations of sulfate, nitrate, and ammonium between simulated results and observational data at the Pudong site of Shanghai.

| SNA                           | Parameter                  | Jan. 2017 | Apr. 2017 | Jul. 2017 | Oct. 2017 | Apr. 2018 | Apr. 2019 | Apr. 2020 | Jan. 2021 | Apr. 2021 | Jul. 2021 | Oct. 2021 |
|-------------------------------|----------------------------|-----------|-----------|-----------|-----------|-----------|-----------|-----------|-----------|-----------|-----------|-----------|
| SO <sub>4</sub> <sup>2-</sup> | N (obs)                    | 707       | 702       | 691       | 693       | 693       | 557       | 673       | 691       | 707       | 738       | 706       |
|                               | N (sim)                    | 744       | 720       | 744       | 744       | 720       | 720       | 720       | 744       | 720       | 744       | 744       |
|                               | Obs (μg m <sup>-3</sup> )  | 9.47      | 8.06      | 5.96      | 4.83      | 6.82      | 6.21      | 4.33      | 5.13      | 4.71      | 3.41      | 3.37      |
|                               | Sim (μg m <sup>-3</sup> )  | 6.62      | 7.02      | 5.12      | 3.87      | 4.99      | 6.02      | 4.01      | 5.00      | 4.21      | 2.71      | 3.13      |
|                               | r                          | 0.41      | 0.10      | 0.71      | 0.30      | 0.33      | 0.04      | 0.03      | 0.19      | 0.32      | 0.34      | 0.25      |
|                               | NMB (%)                    | -30.4     | -12.1     | -15.4     | -19.3     | -25.7     | -1.8      | -6.9      | -3.0      | -10.1     | -20.2     | -6.2      |
|                               | RMSE (μg m <sup>-3</sup> ) | 7.33      | 6.48      | 2.73      | 3.94      | 4.34      | 6.41      | 3.22      | 3.61      | 4.92      | 2.27      | 2.60      |
| NO <sub>3</sub> <sup>-</sup>  | N (obs)                    | 707       | 702       | 691       | 691       | 693       | 557       | 673       | 691       | 707       | 738       | 706       |
|                               | N (sim)                    | 744       | 720       | 744       | 744       | 720       | 720       | 720       | 744       | 720       | 744       | 744       |
|                               | Obs (μg m <sup>-3</sup> )  | 11.42     | 10.45     | 2.58      | 4.11      | 8.73      | 11.62     | 8.30      | 9.08      | 8.59      | 2.46      | 3.59      |
|                               | Sim (μg m <sup>-3</sup> )  | 14.56     | 5.48      | 1.71      | 1.94      | 5.26      | 9.27      | 5.88      | 14.38     | 5.17      | 1.30      | 3.05      |
|                               | r                          | 0.61      | 0.36      | 0.54      | 0.33      | 0.38      | 0.46      | 0.27      | 0.26      | 0.52      | 0.34      | 0.65      |
|                               | NMB (%)                    | 26.0      | -47.4     | -33.3     | -51.1     | -41.2     | -16.0     | -29.0     | 63.8      | -39.0     | -46.8     | -7.8      |
|                               | RMSE (μg m <sup>-3</sup> ) | 11.00     | 9.28      | 4.45      | 5.61      | 9.02      | 11.00     | 7.48      | 12.42     | 8.88      | 5.01      | 5.67      |
| NH <sub>4</sub> <sup>+</sup>  | N (obs)                    | 707       | 702       | 675       | 686       | 692       | 556       | 673       | 691       | 707       | 730       | 706       |
|                               | N (sim)                    | 744       | 720       | 744       | 744       | 720       | 720       | 720       | 744       | 720       | 744       | 744       |
|                               | Obs (μg m <sup>-3</sup> )  | 7.48      | 5.91      | 3.15      | 2.63      | 4.70      | 5.49      | 3.93      | 5.50      | 4.16      | 1.88      | 1.99      |
|                               | Sim (μg m <sup>-3</sup> )  | 6.20      | 6.35      | 2.00      | 1.51      | 2.77      | 4.53      | 2.60      | 5.45      | 2.44      | 0.90      | 1.51      |
|                               | r                          | 0.65      | 0.47      | 0.67      | 0.35      | 0.38      | 0.43      | 0.22      | 0.20      | 0.52      | 0.43      | 0.77      |
|                               | NMB (%)                    | -17.9     | 9.1       | -36.6     | -41.2     | -41.6     | -14.5     | -33.0     | 0.9       | -40.6     | -51.5     | -23.1     |
|                               | RMSE (μg m <sup>-3</sup> ) | 4.86      | 6.02      | 2.21      | 2.97      | 3.99      | 4.42      | 3.24      | 4.07      | 3.95      | 2.06      | 1.66      |

Note: N(obs) and N (sim) are numbers of observational data and simulated results, respectively.



**Table S11.** Comparison of hourly V and Ni concentration between simulated results and observational data at the Pudong site of Shanghai during the simulation period.

| Metal | Parameter                              | Jan. 2017 | Apr. 2017 | Jul. 2017 | Oct. 2017 | Apr. 2018 | Apr. 2019 | Apr. 2020 | Jan. 2021 | Apr. 2021 | Jul. 2021 | Oct. 2021 |
|-------|----------------------------------------|-----------|-----------|-----------|-----------|-----------|-----------|-----------|-----------|-----------|-----------|-----------|
| V     | N (obs)                                | 679       | 623       | 596       | 733       | 567       | 503       | 281       | 233       | 374       | 394       | 361       |
|       | N (sim)                                | 744       | 720       | 744       | 744       | 720       | 720       | 720       | 744       | 720       | 744       | 744       |
|       | $\overline{Obs}$ (ng m <sup>-3</sup> ) | 10.76     | 17.02     | 9.70      | 8.27      | 16.32     | 7.23      | 1.23      | 1.49      | 1.41      | 1.46      | 1.11      |
|       | $\overline{Sim}$ (ng m <sup>-3</sup> ) | 15.18     | 17.65     | 11.08     | 9.93      | 15.81     | 7.73      | 2.21      | 2.41      | 1.86      | 0.90      | 1.43      |
|       | r                                      | 0.43      | 0.12      | 0.61      | 0.29      | 0.33      | 0.56      | 0.41      | 0.35      | 0.24      | 0.25      | 0.13      |
|       | IoA                                    | 0.63      | 0.41      | 0.75      | 0.48      | 0.51      | 0.73      | 0.54      | 0.53      | 0.47      | 0.48      | 0.41      |
|       | RMSE (ng m <sup>-3</sup> )             | 14.22     | 22.40     | 10.00     | 12.49     | 16.83     | 7.22      | 2.14      | 2.21      | 1.73      | 1.23      | 1.47      |
| Ni    | N (obs)                                | 741       | 714       | 714       | 735       | 612       | 608       | 703       | 743       | 701       | 621       | 738       |
|       | N (sim)                                | 744       | 720       | 744       | 744       | 720       | 720       | 720       | 744       | 720       | 744       | 744       |
|       | $\overline{Obs}$ (ng m <sup>-3</sup> ) | 5.08      | 7.21      | 4.60      | 4.45      | 7.64      | 5.39      | 3.59      | 3.72      | 3.88      | 2.92      | 3.47      |
|       | $\overline{Sim}$ (ng m <sup>-3</sup> ) | 6.83      | 7.02      | 4.56      | 3.91      | 6.01      | 4.22      | 4.14      | 4.84      | 3.37      | 1.81      | 2.90      |
|       | r                                      | 0.33      | 0.17      | 0.59      | 0.21      | 0.30      | 0.45      | 0.28      | 0.27      | 0.31      | 0.26      | 0.42      |
|       | IoA                                    | 0.56      | 0.44      | 0.76      | 0.44      | 0.46      | 0.58      | 0.50      | 0.49      | 0.58      | 0.48      | 0.65      |
|       | RMSE (ng m <sup>-3</sup> )             | 5.46      | 7.53      | 3.42      | 5.04      | 6.70      | 5.02      | 3.54      | 4.12      | 3.06      | 2.36      | 2.62      |
| Ni/V  | $\overline{Obs}$                       | 0.47      | 0.42      | 0.47      | 0.54      | 0.47      | 0.75      | 2.92      | 2.50      | 2.74      | 2.00      | 3.14      |
|       | $\overline{Sim}$                       | 0.45      | 0.40      | 0.41      | 0.39      | 0.38      | 0.55      | 1.87      | 2.01      | 1.82      | 2.01      | 2.03      |

Note: N(obs) and N (sim) are numbers of observational data and simulated results, respectively.

## References

- Agrawal, H., Welch, W. A., Miller, J. W., and Cocker, D. R.: Emission Measurements from a Crude Oil Tanker at Sea, *Environmental Science & Technology*, 42, 7098-7103, <https://doi.org/10.1021/es703102y>, 2008a.
- Agrawal, H., Malloy, Q. G. J., Welch, W. A., Wayne Miller, J., and Cocker, D. R.: In-use gaseous and particulate matter emissions from a modern ocean going container vessel, *Atmospheric Environment*, 42, 5504-5510, <https://doi.org/10.1016/j.atmosenv.2008.02.053>, 2008b.
- Celo, V., Dabek-Zlotorzynska, E., and McCurdy, M.: Chemical characterization of exhaust emissions from selected canadian marine vessels: the case of trace metals and lanthanoids, *Environmental Science & Technology*, 49, 5220-5226, <https://doi.org/10.1021/acs.est.5b00127>, 2015.
- Hou, W., Liu, Z., Yu, G., Bie, S., Zhang, Y., Chen, Y., Ma, D., Zhang, F., Lou, C., Hu, X., Gui, Y., and Zhou, W.: On-board measurements of OC/EC ratio, mixing state, and light absorption of ship-emitted particles, *Science of the Total Environment*, 904, 166692, <https://doi.org/10.1016/j.scitotenv.2023.166692>, 2023.
- Huang, C., Hu, Q., Wang, H., Qiao, L., Jing, S., Wang, H., Zhou, M., Zhu, S., Ma, Y., Lou, S., Li, L., Tao, S., Li, Y., and Lou, D.: Emission factors of particulate and gaseous compounds from a large cargo vessel operated under real-world conditions, *Environmental Pollution*, 242, 667-674, <https://doi.org/10.1016/j.envpol.2018.07.036>, 2018a.
- Huang, C., Hu, Q., Li, Y., Tian, J., Ma, Y., Zhao, Y., Feng, J., An, J., Qiao, L., Wang, H., Jing, S., Huang, D., Lou, S., Zhou, M., Zhu, S., Tao, S., and Li, L.: Intermediate Volatility Organic Compound Emissions from a Large Cargo Vessel Operated under Real-World Conditions, *Environmental Science & Technology*, 52, 12934-12942, <https://doi.org/10.1021/acs.est.8b04418>, 2018b.
- Yang, L., Zhang, Q., Zhang, Y., Lv, Z., Wu, L., and Mao, H.: Real-world emission characteristics of an ocean-going vessel through long sailing measurement, *Science of the Total Environment*, 810, 152276, <https://doi.org/10.1016/j.scitotenv.2021.152276>, 2022.
- Liu, Y., Xing, J., Wang, S., Fu, X., and Zheng, H.: Source-specific speciation profiles of PM<sub>2.5</sub> for heavy metals and their anthropogenic emissions in China, *Environmental Pollution*, 239, 544-553, <https://doi.org/10.1016/j.envpol.2018.04.047>, 2018.
- Liu, Y., Zhang, W., Bai, Z., Yang, W., Zhao, X., Han, B., and Wang, X.: China Source Profile Shared Service (CSPSS): The Chinese PM<sub>2.5</sub> Database for Source Profiles, *Aerosol and Air Quality Research*, 17, 1501-1514, <https://doi.org/10.4209/aaqr.2016.10.0469>, 2017.
- Sippula, O., Stengel, B., Sklorz, M., Streibel, T., Rabe, R., Orasche, J., Lintelmann, J., Michalke, B., Abbaszade, G., Radischat, C., Groger, T., Schnelle-Kreis, J., Harndorf, H., and Zimmermann, R.: Particle emissions from a marine engine: chemical composition and aromatic emission profiles under various operating conditions, *Environmental Science & Technology*, 48, 11721-11729, <https://doi.org/10.1021/es502484z>, 2014.
- Streibel, T., Schnelle-Kreis, J., Czech, H., Harndorf, H., Jakobi, G., Jokiniemi, J., Karg, E., Lintelmann, J., Matuschek, G., Michalke, B., Muller, L., Orasche, J., Passig, J., Radischat, C., Rabe, R., Reda, A., Ruger, C., Schwemer, T., Sippula, O., Stengel, B., Sklorz, M., Torvela, T., Weggler, B., and Zimmermann, R.: Aerosol emissions of a ship diesel engine operated with diesel fuel or heavy fuel oil, *Environmental Science and Pollution Research*, 24, 10976-10991, <https://doi.org/10.1007/s11356-016-6724-z>, 2017.
- Zhang, F., Chen, Y., Tian, C., Lou, D., Li, J., Zhang, G., and Matthias, V.: Emission factors for gaseous and particulate pollutants from offshore diesel engine vessels in China, *Atmospheric Chemistry and Physics*, 16, 6319-6334, <https://doi.org/10.5194/acp-16-6319-2016>, 2016.

Zhang, F., Xiao, B., Liu, Z., Zhang, Y., Tian, C., Li, R., Wu, C., Lei, Y., Zhang, S., Wan, X., Chen, Y., Han, Y., Cui, M., Huang, C., Wang, H., Chen, Y., and Wang, G.: Real-world emission characteristics of VOCs from typical cargo ships and their potential contributions to secondary organic aerosol and O<sub>3</sub> under low-sulfur fuel policies, *Atmospheric Chemistry and Physics*, 24, 8999-9017, <https://doi.org/10.5194/acp-24-8999-2024>, 2024.
